# Supplementary material
Source: PubMed Central journal article supplement (PMC5898799)
Supplement: NIHMS953860-supplement-supplement_1.pdf [file NIHMS953860-supplement-supplement_1.pdf]

Appendix Table A1. Fit Statistics for Latent Class Analysis Results, by Wave

|                     | # classes           | G2    | AIC   | BIC   |                     | # classes | G2                 | AIC   | BIC   |
|---------------------|---------------------|-------|-------|-------|---------------------|-----------|--------------------|-------|-------|
| 1st Grade (N=15167) | 2                   | 5833  | 5895  | 6132  | 3rd Grade (N=13437) | 2         | 15635              | 15713 | 16006 |
|                     | 3                   | 4153  | 4247  | 4607  |                     | 3         | 14481              | 15599 | 15042 |
|                     | 4                   | 3865  | 3991  | 4474  |                     | 4         | 14006              | 14164 | 14757 |
|                     | 5                   | 3618  | 3776  | 4380  |                     | 5         | 13798              | 13996 | 14739 |
|                     | 6                   | 3482  | 3672  | 4400  |                     | 6         | 13606              | 13844 | 14737 |
|                     | 7                   | 3391  | 3613  | 4463  |                     | 7         | 13457              | 13735 | 14778 |
|                     | 8                   | 3321  | 3575  | 4548  |                     | 8         | 13334              | 13652 | 14845 |
|                     | 9                   | 3260  | 3546  | 4641  |                     | 9         | 13212              | 13570 | 14913 |
|                     | 10                  | 3206  | 3524  | 4741  |                     | 10        | 13102              | 13500 | 14994 |
|                     | 5th Grade (N=10994) | 2     | 12883 | 12957 |                     | 13228     | 8th Grade (N=8786) | 2     | 7316  |
| 3                   |                     | 12089 | 12201 | 12610 | 3                   | 6967      |                    | 7067  | 7421  |
| 4                   |                     | 11754 | 11904 | 12452 | 4                   | 6638      |                    | 6772  | 7247  |
| 5                   |                     | 11577 | 11765 | 12452 | 5                   | 6468      |                    | 6636  | 7231  |
| 6                   |                     | 11405 | 11630 | 12456 | 6                   | 6268      |                    | 6470  | 7185  |
| 7                   |                     | 11241 | 11505 | 12470 | 7                   | 6169      |                    | 6405  | 7240  |
| 8                   |                     | 11058 | 11360 | 12463 | 8                   | 6051      |                    | 6321  | 7277  |
| 9                   |                     | 10940 | 11280 | 12522 | 9                   | 5958      |                    | 6262  | 7339  |
| 10                  |                     | 10783 | 11161 | 12542 | 10                  | 5855      |                    | 6193  | 7390  |

Source: ECLS-K, 1998-2007. Shaded row indicates selected class solution.

Appendix Table A2. Class-Conditional Response Probabilities from Latent Class Analyses (LCA) for First Grade

|                                  | All | <i>Generally<br/>compromised</i><br>7% | <i>Mixed</i><br>20% | <i>Generally<br/>favorable</i><br>31% | <i>Mid,<br/>compromised<br/>exercise</i><br>22% | <i>Compromised<br/>diet/sleep/<br/>TV</i><br>20% |
|----------------------------------|-----|----------------------------------------|---------------------|---------------------------------------|-------------------------------------------------|--------------------------------------------------|
| Population share                 |     |                                        |                     |                                       |                                                 |                                                  |
| Regular breakfasts/week          |     |                                        |                     |                                       |                                                 |                                                  |
| 0-4                              | .14 | .31                                    | .04                 | .06                                   | .04                                             | .42                                              |
| 5-6                              | .40 | .41                                    | .94                 | .22                                   | .28                                             | .26                                              |
| 7                                | .46 | .28                                    | .01                 | .71                                   | .67                                             | .32                                              |
| Regular dinners/week             |     |                                        |                     |                                       |                                                 |                                                  |
| 0-4                              | .25 | .34                                    | .41                 | .17                                   | .06                                             | .40                                              |
| 5-6                              | .25 | .17                                    | .58                 | .21                                   | .12                                             | .13                                              |
| 7                                | .50 | .49                                    | .00                 | .62                                   | .82                                             | .47                                              |
| Goes to bed at same time         | .91 | .77                                    | .92                 | .98                                   | .94                                             | .78                                              |
| Dentist                          |     |                                        |                     |                                       |                                                 |                                                  |
| Never                            | .04 | .21                                    | .03                 | .01                                   | .05                                             | .04                                              |
| More than 1 year                 | .09 | .74                                    | .05                 | .02                                   | .08                                             | .00                                              |
| Within year                      | .87 | .05                                    | .93                 | .97                                   | .86                                             | .96                                              |
| Doctor checkup                   | .86 | .66                                    | .86                 | .88                                   | .87                                             | .92                                              |
| Exercise count (dance/athletics) |     |                                        |                     |                                       |                                                 |                                                  |
| 0                                | .41 | .74                                    | .30                 | .01                                   | .77                                             | .63                                              |
| 1                                | .47 | .23                                    | .55                 | .72                                   | .23                                             | .34                                              |
| 2                                | .12 | .02                                    | .15                 | .27                                   | .00                                             | .03                                              |
| Average TV hours/day             |     |                                        |                     |                                       |                                                 |                                                  |
| 0 - <1                           | .11 | .09                                    | .09                 | .17                                   | .13                                             | .04                                              |
| 1 - <2                           | .35 | .19                                    | .35                 | .47                                   | .36                                             | .22                                              |
| 2 - <3                           | .30 | .28                                    | .35                 | .27                                   | .32                                             | .30                                              |
| 3+                               | .23 | .44                                    | .21                 | .09                                   | .19                                             | .43                                              |
| PE classes/week                  |     |                                        |                     |                                       |                                                 |                                                  |
| 1-2                              | .07 | .13                                    | .06                 | .05                                   | .05                                             | .11                                              |
| 3                                | .65 | .55                                    | .65                 | .72                                   | .63                                             | .58                                              |
| 4-5                              | .28 | .33                                    | .29                 | .23                                   | .32                                             | .31                                              |

Source: ECLS-K, 1998-2007.

Notes: N= 15617. Adjusts for weighting, clustering, and strata using Wave 4 weights. Indicator means for the full population do not account for item missingness and may reflect smaller sample sizes. “Heat map” legend: Dark gray = most compromised class for that indicator; stripes = significantly ( $p < .05$ ) more compromised than sample mean; checks = significantly less compromised than sample mean; light gray = least compromised class for that indicator; white = not significantly different from sample mean, or row not coded. “Compromised” designation is based on the indicator’s relationship to child developmental outcomes in the literature.

Appendix Table A3. Class-Conditional Response Probabilities from Latent Class Analyses (LCA) for Third Grade

|                                |     | <i>Compromised diet/exercise</i><br>10% | <i>Compromised health care/exercise</i><br>10% | <i>Compromised except exercise</i><br>13% | <i>Generally favorable</i><br>33% | <i>Favorable but irregular</i><br>34% |
|--------------------------------|-----|-----------------------------------------|------------------------------------------------|-------------------------------------------|-----------------------------------|---------------------------------------|
| Population share               |     | 10%                                     | 10%                                            | 13%                                       | 33%                               | 34%                                   |
| Regular breakfasts/week        |     |                                         |                                                |                                           |                                   |                                       |
| 0-4                            | .17 | .47                                     | .17                                            | .39                                       | .09                               | .06                                   |
| 5-6                            | .47 | .46                                     | .55                                            | .45                                       | .27                               | .66                                   |
| 7                              | .36 | .08                                     | .28                                            | .17                                       | .64                               | .28                                   |
| Regular dinners/week           |     |                                         |                                                |                                           |                                   |                                       |
| 0-4                            | .30 | .53                                     | .27                                            | .56                                       | .03                               | .40                                   |
| 5-6                            | .24 | .25                                     | .24                                            | .16                                       | .00                               | .49                                   |
| 7                              | .46 | .21                                     | .49                                            | .29                                       | .97                               | .10                                   |
| Child food insecurity          | .10 | .11                                     | .19                                            | .27                                       | .05                               | .05                                   |
| Goes to bed at same time       | .91 | .97                                     | .91                                            | .67                                       | .96                               | .95                                   |
| No dentist                     | .10 | .02                                     | .55                                            | .18                                       | .04                               | .03                                   |
| Doctor checkup                 | .84 | .94                                     | .52                                            | .81                                       | .91                               | .84                                   |
| Spanked                        | .16 | .17                                     | .10                                            | .30                                       | .14                               | .12                                   |
| 20+ min exercise sessions/week |     |                                         |                                                |                                           |                                   |                                       |
| 0                              | .06 | .11                                     | .15                                            | .08                                       | .05                               | .02                                   |
| 1-4                            | .51 | .78                                     | .46                                            | .41                                       | .46                               | .53                                   |
| 5+                             | .43 | .11                                     | .39                                            | .51                                       | .49                               | .45                                   |
| Organized sports count         |     |                                         |                                                |                                           |                                   |                                       |
| 0                              | .20 | .45                                     | .47                                            | .22                                       | .16                               | .07                                   |
| 1                              | .27 | .26                                     | .34                                            | .30                                       | .26                               | .24                                   |
| 2                              | .27 | .21                                     | .15                                            | .26                                       | .29                               | .31                                   |
| 3+                             | .26 | .07                                     | .03                                            | .22                                       | .29                               | .38                                   |
| Average TV hours/day           |     |                                         |                                                |                                           |                                   |                                       |
| 0 - <1                         | .11 | .05                                     | .08                                            | .02                                       | .15                               | .12                                   |
| 1 - <2                         | .35 | .32                                     | .24                                            | .17                                       | .39                               | .43                                   |
| 2 - <3                         | .31 | .29                                     | .33                                            | .35                                       | .30                               | .31                                   |
| 3+                             | .23 | .34                                     | .35                                            | .46                                       | .16                               | .15                                   |
| PE classes/week                |     |                                         |                                                |                                           |                                   |                                       |
| 1-2                            | .06 | .14                                     | .07                                            | .12                                       | .03                               | .04                                   |
| 3                              | .69 | .70                                     | .57                                            | .53                                       | .73                               | .73                                   |
| 4-5                            | .26 | .17                                     | .36                                            | .35                                       | .24                               | .23                                   |

Source: ECLS-K, 1998-2007.

Notes: N=13437. Adjusts for weighting, clustering, and strata using Wave 5 weights. Indicator means for the full population do not account for item missingness and may reflect smaller sample sizes. “Heat map” legend: Dark gray = most compromised class for that indicator; stripes = significantly ( $p < .05$ ) more compromised than sample mean; checks = significantly less compromised than sample mean; light gray = least compromised class for that indicator; white = not significantly different from sample mean, or row not coded. “Compromised” designation is based on the indicator’s relationship to child developmental outcomes in the literature.

Appendix Table A4. Class-Conditional Response Probabilities from Latent Class Analyses (LCA) for Fifth Grade

|                                |     | <i>Favorable but irregular</i><br>41% | <i>Compromised except exercise</i><br>24% | <i>Generally favorable</i><br>19% | <i>Compromised exercise/health care</i><br>3% | <i>Compromised exercise/TV</i><br>13% |
|--------------------------------|-----|---------------------------------------|-------------------------------------------|-----------------------------------|-----------------------------------------------|---------------------------------------|
| Population share               |     |                                       |                                           |                                   |                                               |                                       |
| Regular breakfasts/week        |     |                                       |                                           |                                   |                                               |                                       |
| 0-4                            | .17 | .09                                   | .33                                       | .07                               | .27                                           | .28                                   |
| 5-6                            | .51 | .61                                   | .56                                       | .19                               | .37                                           | .59                                   |
| 7                              | .32 | .30                                   | .11                                       | .75                               | .36                                           | .13                                   |
| Regular dinners/week           |     |                                       |                                           |                                   |                                               |                                       |
| 0-4                            | .33 | .40                                   | .46                                       | .02                               | .31                                           | .34                                   |
| 5-6                            | .27 | .36                                   | .26                                       | .04                               | .22                                           | .36                                   |
| 7                              | .40 | .24                                   | .11                                       | .75                               | .36                                           | .13                                   |
| Child food insecurity          | .12 | .04                                   | .27                                       | .12                               | .17                                           | .11                                   |
| Goes to bed at same time       | .92 | .98                                   | .80                                       | .96                               | .97                                           | .86                                   |
| No dentist                     | .10 | .02                                   | .17                                       | .06                               | .99                                           | .07                                   |
| Doctor checkup                 | .83 | .84                                   | .78                                       | .89                               | .02                                           | .97                                   |
| 20+ min exercise sessions/week |     |                                       |                                           |                                   |                                               |                                       |
| 0                              | .06 | .01                                   | .09                                       | .06                               | .13                                           | .15                                   |
| 1-4                            | .56 | .58                                   | .49                                       | .48                               | .44                                           | .79                                   |
| 5+                             | .38 | .41                                   | .42                                       | .46                               | .43                                           | .06                                   |
| Organized sports count         |     |                                       |                                           |                                   |                                               |                                       |
| 0                              | .18 | .06                                   | .32                                       | .19                               | .35                                           | .29                                   |
| 1                              | .28 | .25                                   | .36                                       | .24                               | .41                                           | .28                                   |
| 2                              | .27 | .32                                   | .16                                       | .33                               | .20                                           | .28                                   |
| 3+                             | .26 | .38                                   | .16                                       | .25                               | .04                                           | .16                                   |
| Average TV hours/day           |     |                                       |                                           |                                   |                                               |                                       |
| 0 - <1                         | .09 | .09                                   | .06                                       | .16                               | .03                                           | .01                                   |
| 1 - <2                         | .32 | .37                                   | .21                                       | .37                               | .31                                           | .26                                   |
| 2 - <3                         | .34 | .38                                   | .33                                       | .29                               | .28                                           | .29                                   |
| 3+                             | .26 | .15                                   | .40                                       | .17                               | .37                                           | .43                                   |
| PE classes/week                |     |                                       |                                           |                                   |                                               |                                       |
| 1-2                            | .07 | .04                                   | .11                                       | .08                               | .03                                           | .08                                   |
| 3                              | .66 | .67                                   | .48                                       | .70                               | .71                                           | .92                                   |
| 4-5                            | .27 | .29                                   | .41                                       | .21                               | .26                                           | .00                                   |

Source: ECLS-K, 1998-2007.

Notes: N=10994. Adjusts for weighting, clustering, and strata using Wave 6 weights. Indicator means for the full population do not account for item missingness and may reflect smaller sample sizes. “Heat map” legend: Dark gray = most compromised class for that indicator; stripes = significantly ( $p < .05$ ) more compromised than sample mean; checks = significantly less compromised than sample mean; light gray = least compromised class for that indicator; white = not significantly different from sample mean, or row not coded. “Compromised” designation is based on the indicator’s relationship to child developmental outcomes in the literature.

Appendix Table A5. Average Marginal Effects from Multinomial Logistic Regression Model Predicting First-Grade Classes

|                                      | <i>Generally compromised</i> |    | <i>Mixed</i> | <i>Generally favorable</i> |     | <i>Mid, compromised exercise</i> |     | <i>Compromised diet/sleep/TV</i> |     |
|--------------------------------------|------------------------------|----|--------------|----------------------------|-----|----------------------------------|-----|----------------------------------|-----|
| <b>Controls (Kindergarten)</b>       |                              |    |              |                            |     |                                  |     |                                  |     |
| Male                                 | .01                          |    | .00          | .01                        |     | -.02                             |     | .00                              |     |
| Race/ethnicity (white)               |                              |    |              |                            |     |                                  |     |                                  |     |
| Black                                | .03                          | +  | .01          | -.15                       | *** | .00                              |     | .11                              | *** |
| Hispanic                             | .03                          |    | .00          | -.06                       | *   | .01                              |     | .02                              |     |
| Asian/Pacific Islander               | .01                          |    | -.05         | -.08                       | *   | .05                              |     | .06                              |     |
| American Indian                      | -.03                         | +  | -.07         | .06                        |     | .06                              | +   | -.02                             |     |
| Multiracial                          | .03                          |    | -.01         | -.05                       |     | -.01                             |     | .03                              |     |
| Age                                  | .00                          |    | .00          | .00                        |     | .00                              |     | .00                              |     |
| Maternal age                         | .00                          |    | .00          | .00                        |     | .00                              |     | .00                              |     |
| Maternal age at first birth          | .00                          |    | .00          | .00                        | *   | .00                              |     | -.01                             | **  |
| Non-English household                | .01                          |    | -.12         | **                         |     | -.03                             |     | .08                              | **  |
| # siblings                           | .01                          |    | .00          | -.01                       |     | .00                              |     | .00                              |     |
| <b>Resources (Kindergarten)</b>      |                              |    |              |                            |     |                                  |     |                                  |     |
| Income-to-needs                      | -.01                         |    | .01          | **                         |     | .02                              | *** | -.02                             | **  |
| Maternal education (advanced degree) |                              |    |              |                            |     |                                  |     |                                  |     |
| Less than high school                | .06                          | +  | .01          | -.23                       | *** | .06                              |     | .09                              | *   |
| High school                          | .04                          |    | .04          | -.18                       | *** | .03                              |     | .07                              | +   |
| Some college                         | .02                          |    | .00          | -.10                       | *   | .04                              |     | .03                              |     |
| College degree                       | .00                          |    | .02          | -.03                       |     | .01                              |     | .01                              |     |
| Married                              | -.01                         |    | -.02         | .06                        | **  | -.01                             |     | -.01                             |     |
| No health insurance                  | .04                          | ** | .01          | -.07                       | +   | .01                              |     | .00                              |     |
| <b>Parenting (Kindergarten)</b>      |                              |    |              |                            |     |                                  |     |                                  |     |
| # activities                         | -.01                         | *  | .00          | .04                        | *** | -.02                             | **  | -.01                             | *   |
| Parenting scale                      | -.03                         | *  | -.06         | *                          |     | .10                              | *** | .03                              |     |

Source: ECLS-K, 1998-2007.

Notes: N=8786. Accounts for complex sampling design. + p<.10 \* p<.05 \*\* p<.01 \*\*\* p<.001; two-tailed tests.

Appendix Table A6. Average Marginal Effects from Multinomial Logistic Regression Model Predicting Eighth-Grade Classes

|                                                  | <i>Mid, compromised diet/TV</i> |        | <i>Generally favorable</i> |          | <i>Favorable but irregular</i> |          | <i>Mid, compromised exercise/TV</i> |          | <i>Compromised exercise/health care</i> |        |
|--------------------------------------------------|---------------------------------|--------|----------------------------|----------|--------------------------------|----------|-------------------------------------|----------|-----------------------------------------|--------|
|                                                  | 1                               | 2      | 1                          | 2        | 1                              | 2        | 1                                   | 2        | 1                                       | 2      |
| <b>Controls (Kindergarten)</b>                   |                                 |        |                            |          |                                |          |                                     |          |                                         |        |
| Male                                             | .04 **                          | .05 ** | .02 +                      | .02      | .01                            | .01      | -.08 ***                            | -.07 *** | .00                                     | .00    |
| Race/ethnicity (white)                           |                                 |        |                            |          |                                |          |                                     |          |                                         |        |
| Black                                            | .05 +                           | .03    | -.01                       | .02      | -.10 ***                       | -.08 **  | .04                                 | .03      | .02                                     | .01    |
| Hispanic                                         | .06 *                           | .05 *  | -.05 *                     | -.05 *   | -.10 ***                       | -.08 *** | .07 *                               | .06 *    | .02                                     | .01    |
| Asian/Pacific Islander                           | -.03                            | -.03   | .00                        | .00      | -.05                           | -.02     | .06                                 | .04      | .01                                     | .00    |
| American Indian                                  | -.04 +                          | -.05 * | -.06 +                     | -.06 *   | -.03                           | .00      | .14 ***                             | .12 **   | -.01                                    | -.01   |
| Multiracial                                      | .00                             | .00    | .05                        | .05      | -.12 **                        | -.11 **  | .01                                 | .00      | .06                                     | .07 +  |
| Age                                              | .00                             | .00    | .00                        | .00 +    | .00                            | .00      | .00 *                               | .00 *    | .00                                     | .00    |
| Maternal age                                     | .00                             | .00    | .00                        | .00      | .00                            | .00      | .00 *                               | .00 +    | .00                                     | .00    |
| Maternal age first birth                         | .00                             | .00    | .00                        | .00      | .00 +                          | .00      | .00                                 | .00      | .00                                     | .00    |
| Non-English household                            | .02                             | .02    | .04 +                      | .03      | -.04                           | -.01     | -.03                                | -.04     | .01                                     | .00    |
| # siblings                                       | .00                             | .00    | .00                        | -.01     | .01                            | .01      | -.01                                | -.01     | .00                                     | .00    |
| <b>Resources (Kindergarten)</b>                  |                                 |        |                            |          |                                |          |                                     |          |                                         |        |
| Income-to-needs                                  | -.01                            | -.01   | .00                        | .00      | .01 ***                        | .01 ***  | -.01                                | -.01     | .00                                     | .00    |
| Maternal education (advanced degree)             |                                 |        |                            |          |                                |          |                                     |          |                                         |        |
| Less than high school                            | .05                             | .04    | -.09 *                     | -.07 *   | -.07                           | -.02     | .09 +                               | .06      | .01                                     | .00    |
| High school                                      | .07 +                           | .06    | -.04                       | -.02     | -.06 +                         | -.04     | .04                                 | .01      | .00                                     | .00    |
| Some college                                     | .05                             | .04    | -.02                       | -.01     | -.05                           | -.04     | .02                                 | .01      | .01                                     | .00    |
| College degree                                   | .02                             | .02    | .03                        | .03      | -.03                           | -.03     | -.02                                | -.03     | .00                                     | .00    |
| Married                                          | -.03 +                          | -.03 + | .04 *                      | .05 *    | -.02                           | -.03     | .01                                 | .01      | .01                                     | .01    |
| No health insurance                              | .01                             | .00    | .01                        | .01      | -.07 *                         | -.06 +   | .04                                 | .03      | .02 +                                   | .01    |
| <b>Parenting (Kindergarten)</b>                  |                                 |        |                            |          |                                |          |                                     |          |                                         |        |
| # activities                                     | .00                             | .00    | .01 +                      | .01      | .02 **                         | .01 *    | -.02 **                             | -.02 *   | -.01 *                                  | .00    |
| Parenting scale                                  | -.02                            | -.01   | .03                        | .00      | .01                            | .01      | -.01                                | .00      | -.01                                    | .00    |
| <b>First-grade classes (Generally favorable)</b> |                                 |        |                            |          |                                |          |                                     |          |                                         |        |
| Generally compromised                            |                                 | .02    |                            | -.07     |                                | -.03     |                                     | .04      |                                         | .04 *  |
| Mixed                                            |                                 | .03    |                            | -.09 *** |                                | .03      |                                     | .02      |                                         | .00    |
| Mid, compromised exercise                        |                                 | .01    |                            | -.01     |                                | -.11 *** |                                     | .09 **   |                                         | .03 ** |
| Compromised diet/sleep/TV                        |                                 | .01    |                            | -.02     |                                | -.03     |                                     | .02      |                                         | .02 *  |
| <b>Third-grade classes (Generally favorable)</b> |                                 |        |                            |          |                                |          |                                     |          |                                         |        |
| Compromised diet/exercise                        |                                 | .00    |                            | -.05 +   |                                | .00      |                                     | .04      |                                         | .02 +  |
| Compromised health care/exercise                 |                                 | .05    |                            | -.04     |                                | -.07 *   |                                     | .03      |                                         | .03 *  |

|                                                  |         |          |       |       |     |    |
|--------------------------------------------------|---------|----------|-------|-------|-----|----|
| Compromised except exercise                      | .00     | -.04     | .01   | .01   | .02 | +  |
| Favorable but irregular                          | .00     | -.03 *   | .05 * | -.02  | .01 | +  |
| <b>Fifth-grade classes (Generally favorable)</b> |         |          |       |       |     |    |
| Favorable but irregular                          | .05 *   | -.09 *** | .06 * | -.02  | .01 |    |
| Compromised except exercise                      | .10 *** | -.11 *** | -.02  | .01   | .01 |    |
| Compromised exercise/health care                 | .14 *   | -.13 **  | -.05  | -.03  | .07 | ** |
| Compromised exercise/TV                          | .05 +   | -.14 *** | .02   | .08 * | .00 |    |

Source: ECLS-K, 1998-2007.

Notes: N=8786. Accounts for complex sampling design. + p<.10 \* p<.05 \*\* p<.01 \*\*\* p<.001; two-tailed tests.

Appendix Table A7. Average Marginal Effects from Multinomial Logistic Regression Model  
Predicting Eighth-Grade Classes

|                                             | <i>Mid,<br/>compromised<br/>diet/TV</i> |     | <i>Generally<br/>favorable</i> |    | <i>Favorable but<br/>irregular</i> |    | <i>Mid,<br/>compromised<br/>exercise/TV</i> |     | <i>Compromised<br/>exercise/<br/>health care</i> |   |
|---------------------------------------------|-----------------------------------------|-----|--------------------------------|----|------------------------------------|----|---------------------------------------------|-----|--------------------------------------------------|---|
| <b>Peer characteristics (First grade)</b>   |                                         |     |                                |    |                                    |    |                                             |     |                                                  |   |
| Modal class (generally favorable)           |                                         |     |                                |    |                                    |    |                                             |     |                                                  |   |
| Generally compromised                       | .04                                     |     | -.02                           |    | -.02                               |    | .00                                         |     | -.01                                             |   |
| Mixed                                       | -.04                                    |     | .00                            | *  | .04                                | +  | .01                                         |     | .00                                              |   |
| Mid, compromised exercise                   | .00                                     |     | -.03                           |    | -.01                               |    | .02                                         |     | .02                                              |   |
| Compromised diet/sleep/TV                   | .02                                     | +   | -.05                           |    | .03                                |    | -.01                                        |     | .00                                              |   |
| Percent of modal class                      | -.01                                    | *   | -.16                           |    | .18                                | ** | .04                                         |     | -.05                                             |   |
| <b>School characteristics (First grade)</b> |                                         |     |                                |    |                                    |    |                                             |     |                                                  |   |
| Public school                               | .02                                     |     | -.03                           |    | -.03                               |    | .02                                         |     | .02                                              |   |
| % nonwhite                                  | .00                                     |     | .00                            |    | .00                                |    | .00                                         |     | .00                                              | + |
| % free/reduced price lunch                  | .00                                     |     | .00                            | *  | .00                                | ** | .00                                         |     | .00                                              |   |
| <b>Controls (Kindergarten)</b>              |                                         |     |                                |    |                                    |    |                                             |     |                                                  |   |
| Male                                        | .04                                     | **  | .03                            | *  | .03                                | +  | -.10                                        | *** | .00                                              |   |
| Race/ethnicity (white)                      |                                         |     |                                |    |                                    |    |                                             |     |                                                  |   |
| Black                                       | .03                                     |     | -.02                           |    | -.07                               | *  | .06                                         |     | .00                                              |   |
| Hispanic                                    | .05                                     |     | -.06                           | ** | -.04                               |    | .06                                         | +   | .00                                              |   |
| Asian/Pacific Islander                      | -.06                                    | *   | .02                            |    | -.01                               |    | .06                                         |     | .00                                              |   |
| American Indian                             | -.09                                    | *** | -.03                           |    | .02                                |    | .12                                         | **  | -.02                                             | * |
| Multiracial                                 | -.01                                    |     | .04                            |    | -.10                               | *  | -.01                                        |     | .08                                              |   |
| <b>Resources (Kindergarten)</b>             |                                         |     |                                |    |                                    |    |                                             |     |                                                  |   |
| Income-to-needs                             | -.01                                    | *   | .01                            | +  | .01                                | ** | .00                                         |     | .00                                              |   |
| Maternal education (advanced degree)        |                                         |     |                                |    |                                    |    |                                             |     |                                                  |   |
| Less than high school                       | .05                                     |     | -.07                           | *  | -.06                               |    | .07                                         |     | .01                                              |   |
| High school                                 | .05                                     |     | -.02                           |    | -.06                               |    | .03                                         |     | .00                                              |   |
| Some college                                | .04                                     |     | -.01                           |    | -.03                               |    | .00                                         |     | .00                                              |   |
| College degree                              | .03                                     |     | .01                            |    | .00                                |    | -.05                                        |     | .01                                              |   |
| Married                                     | -.03                                    |     | .05                            | *  | -.03                               |    | .00                                         |     | .01                                              |   |
| No health insurance                         | .02                                     |     | .03                            |    | -.08                               | *  | .02                                         |     | .01                                              |   |
| <b>Parenting (Kindergarten)</b>             |                                         |     |                                |    |                                    |    |                                             |     |                                                  |   |
| # activities                                | .00                                     |     | .01                            | ** | .01                                | *  | -.02                                        | **  | -.01                                             |   |
| Parenting scale                             | -.01                                    |     | .02                            |    | .01                                |    | -.01                                        |     | -.01                                             |   |

Source: ECLS-K, 1998-2007.

Notes: N=7829. Accounts for complex sampling design. Nonsignificant covariates (child age, maternal age at survey, maternal age at birth, household language, # siblings, school enrollment, school % passing reading) not shown. + p<.10 \* p<.05 \*\* p<.01 \*\*\* p<.001; two-tailed tests.
